# Supplementary material for: Hydrothermal Cation Exchange Enabled Gradual Evolution of Au@ZnS–AgAuS Yolk–Shell Nanocrystals and Their Visible Light Photocatalytic Applications
Source: PubMed Central journal article supplement (PMC5770678; doi:10.1002/advs.201700376), 2017-11-20
Supplement: ADVS-5-na-s001.pdf [file ADVS-5-na-s001.pdf]

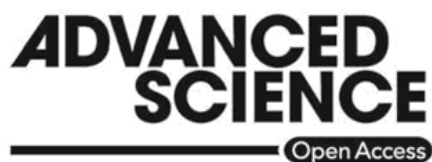

## Supporting Information

for *Adv. Sci.*, DOI: 10.1002/advs.201700376

Hydrothermal Cation Exchange Enabled Gradual Evolution of Au@ZnS–AgAuS Yolk–Shell Nanocrystals and Their Visible Light Photocatalytic Applications

*Jingwen Feng, Jia Liu, Xiaoyan Cheng, Jiajia Liu, Meng Xu, and Jiatao Zhang\**

## Supporting Information

### **Hydrothermal Cation Exchange Enabled Gradual Evolution of Au@ZnS-AgAuS Yolk-shell Nanocrystals and Their Visible Light Photocatalytic Applications**

*Jingwen Feng, Jia Liu, Xiaoyan Cheng, Jiajia Liu, Meng Xu, Jiatao Zhang\**

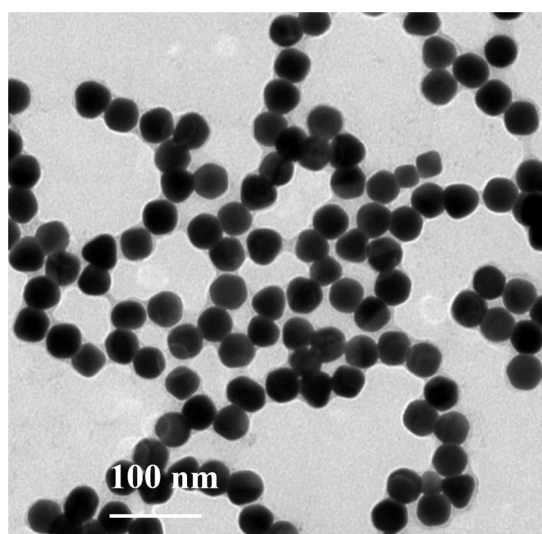

**Figure S1** TEM image of Au core.

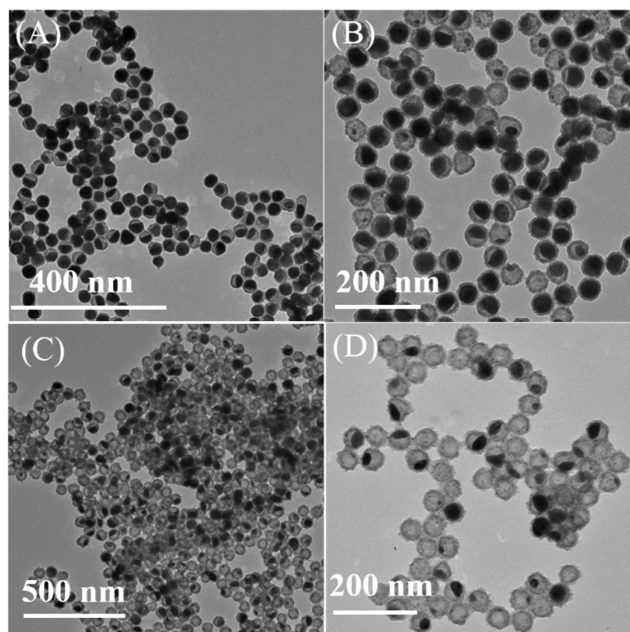

**Figure S2** Large-scale TEM images of A) Au@ZnS-AgAuS (120 °C 2 h), B) Au@ZnS-AgAuS (120 °C 4 h), C) Au@ZnS-AgAuS (140 °C 4 h) and D) Au@ZnS-AgAuS (160 °C 4 h) Y-S NCs

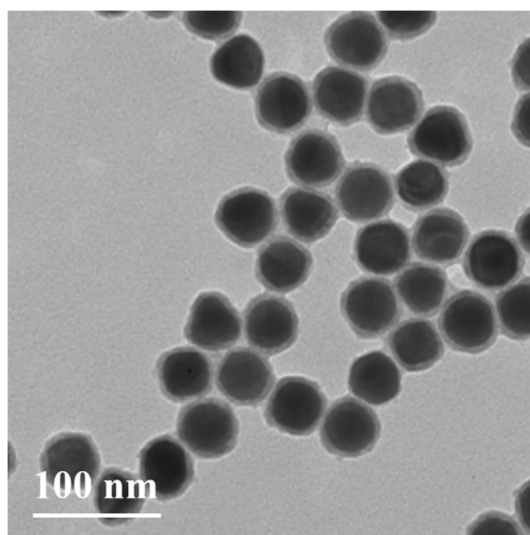

**Figure S3** TEM image of Au@ZnS-AgAuS NCs, which were obtained at 120 °C for 30 min.

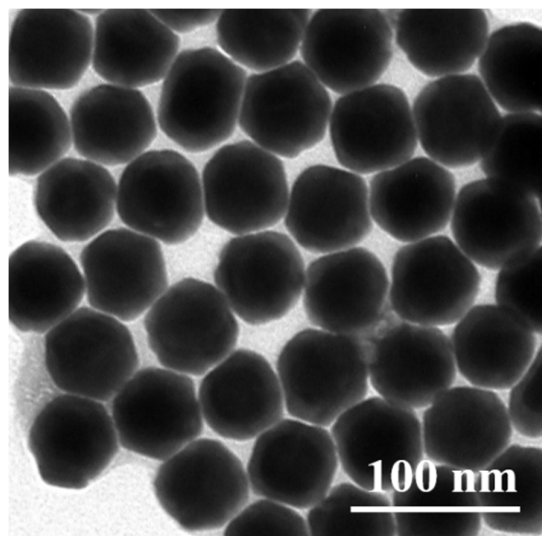

**Figure S4** TEM image of Au@AgAuS, obtained at 140 °C for 4 h. (absence of Zn<sup>2+</sup> and TBP)

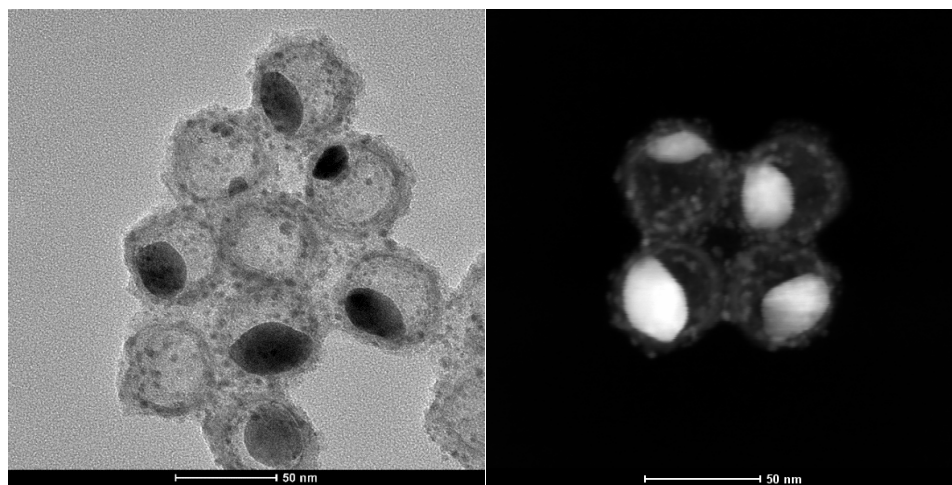

**Figure S5** TEM and STEM images of Au@ZnS-AgAuS (140 °C 4 h) Y-S NCs.

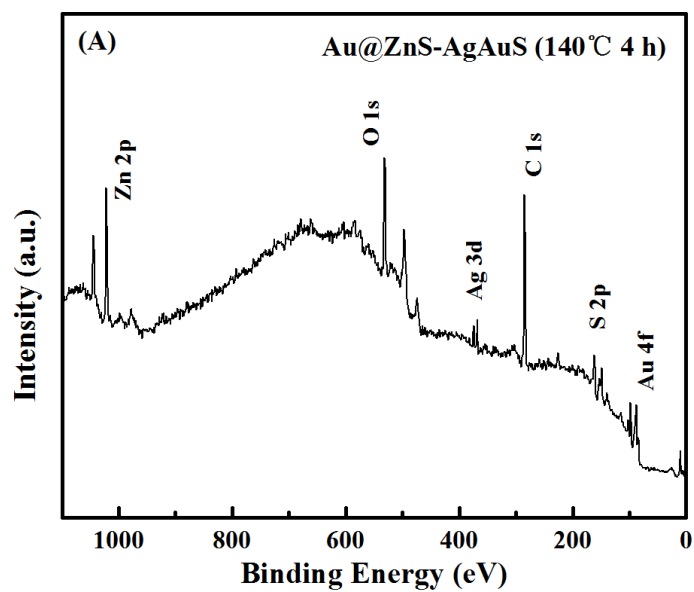

**Figure S6** XPS spectra of Au@ZnS-AgAuS (140 °C 4 h) Y-S NCs

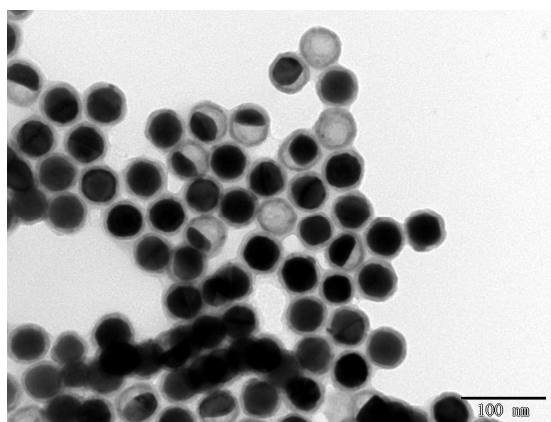

**Figure S7** TEM image of Au@ZnS-AgAuS Y-S NCs in the presence of CTAC. (150 °C for 4 h)

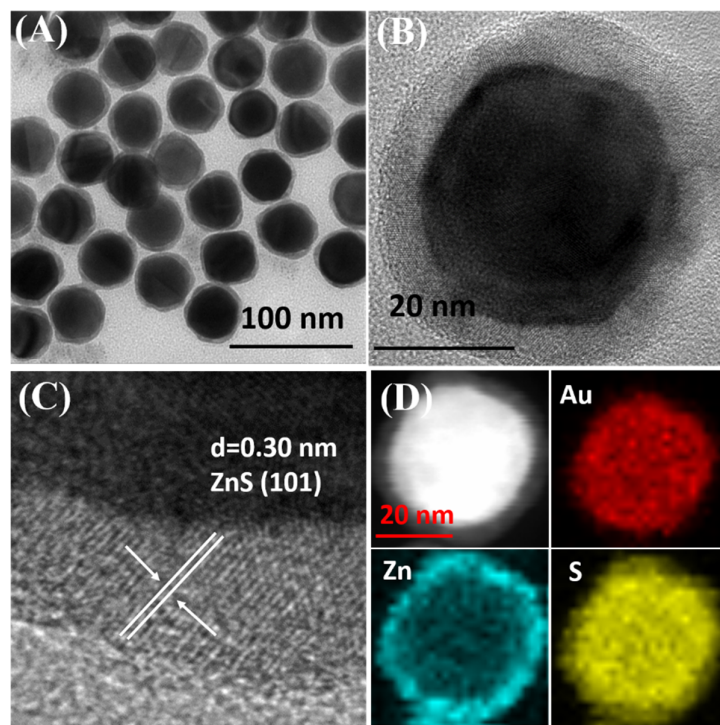

**Figure S8** A, B) TEM image and of Au@ZnS core-shell NCs. C) HRTEM image D) STEM-EDS elemental maps of Au@ZnS core-shell NCs.
